# Supplementary material for: Association between the GLP1R A316T Mutation and Adolescent Idiopathic Scoliosis in French Canadian and Italian Cohorts
Source: MDPI journal article supplement (doi:10.3390/genes15040481), 2024-04-11
Supplement: s1 [file s1]

**Supplementary Table S1.** Association of the *GLP1R* rs10305492 polymorphism with AIS susceptibility in the French-Canadian and Italian cohorts

| GLPIR<br>rs10305492 | French-Canadian cohort (n=636) |        |      |        |          |                      | Italian cohort (n=389) |          |        |     |        |                |                       |
|---------------------|--------------------------------|--------|------|--------|----------|----------------------|------------------------|----------|--------|-----|--------|----------------|-----------------------|
|                     | Controls                       |        | AIS  |        | $\chi^2$ | P value <sup>a</sup> | OR<br>(95% CI)         | Controls |        | AIS |        | OR<br>(95% CI) |                       |
|                     | n                              | (%)    | n    | (%)    |          |                      |                        | n        | (%)    | n   | (%)    |                |                       |
| Genotype            |                                |        |      |        | 1.70     | 0.193                |                        |          |        |     | 0.06   | 0.807          |                       |
| G/G                 | 93                             | (97.9) | 513  | (94.8) |          |                      | Reference              | 216      | (99.1) | 169 | (98.8) |                | Reference             |
| A/G                 | 2                              | (2.1)  | 28   | (5.2)  |          |                      | 2.54<br>(0.70 – 10.97) | 2        | (0.9)  | 2   | (1.2)  |                | 1.28<br>(0.18 – 8.96) |
| Allele              |                                |        |      |        | 1.65     | 0.198                |                        |          |        |     | 0.06   | 0.804          |                       |
| G                   | 188                            | (98.9) | 1054 | (97.4) |          |                      | Reference              | 436      | (99.5) | 340 | (99.4) |                | Reference             |
| A                   | 2                              | (1.1)  | 28   | (2.6)  |          |                      | 2.50<br>(0.64 – 10.73) | 2        | (0.5)  | 2   | (0.6)  |                | 1.28<br>(0.20 – 8.22) |

Allelic and genotypic distributions of the polymorphism was assessed in AIS patients and healthy controls separately in the French-Canadian and Italian cohorts. AIS: Adolescent idiopathic scoliosis, OR: Odds ratio, CI: confidence interval. <sup>a</sup> Pearson's chi-square test ( $\chi^2$ ).
